# Supplementary material
Source: Copernicus journal article supplement (doi:10.5194/bg-23-3387-2026)
Supplement: Supplementary file 1 [file bg-23-3387-2026-supplement.pdf]

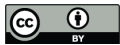

*Supplement of*

## **Future mercury levels in fish: model vs. observational predictions under different policy scenarios**

**Henna Gull et al.**

*Correspondence to:* Sae Yun Kwon (saeyunk@postech.ac.kr)

The copyright of individual parts of the supplement might differ from the article licence.

**Section S1.** Percentage annual change for each variable (X = Hg emissions, Hg deposition, or fish MeHg) was calculated as:

$$\% \text{ annual change in } X = \frac{\left( \frac{X_{2050, \text{scenario}}}{X_{\text{base year, scenario}}} - 1 \right)}{n} * 100$$

5 Where:

$X_{2050, \text{scenario}}$  = modeled value under a given scenario in 2050

$X_{\text{base year, scenario}}$  = modeled value in the base year used in that study

$n$  = number of years between the base year and future year

10 **Table S1.** Anthropogenic and natural mercury emission inventories applied in atmospheric Models.

| <b>References (models)</b>                                                                             | <b>Anthropogenic</b>                                                                                                                                                                            | <b>Natural</b>                                                                                                                                                                                                 |
|--------------------------------------------------------------------------------------------------------|-------------------------------------------------------------------------------------------------------------------------------------------------------------------------------------------------|----------------------------------------------------------------------------------------------------------------------------------------------------------------------------------------------------------------|
| <b>↓ Scenarios</b>                                                                                     |                                                                                                                                                                                                 |                                                                                                                                                                                                                |
| (Corbitt et al. 2011) (Geos-Chem)<br>A1B, A2, B1, and B2                                               | (Pacyna et al. 2010) – base year emissions<br>(Streets et al. 2009) – future emission scenarios                                                                                                 | GEOS-Chem parameterization – geogenic/ legacy emissions                                                                                                                                                        |
| (Lei et al. 2014) (CAM-Chem/Hg)<br>A1B, B1, and A1F1                                                   | (Pacyna et al. 2006) – base year emissions<br>(Streets et al. 2009) – future emission scenarios                                                                                                 | (Lei et al. 2013) – natural/legacy emissions<br>(Witt et al. 2008; Aiuppa et al. 2007) – volcanic emissions<br>(IPCC 2001) – forest & grassland burning<br>(Smith-Downey et al. 2010) – terrestrial Hg storage |
| (Vijayaraghavan et al. 2014) (CTM)<br>A2 and B2                                                        | (EPRI 2006) – base year emissions<br>(Streets et al. 2009) – future emission scenarios                                                                                                          | (Seigneur et al. 2004) – natural/legacy re-emissions                                                                                                                                                           |
| (Giang and Selin 2016) (Geos-Chem)<br>No policy and Minamata                                           | (Pacyna et al. 2006) – base year emissions<br>(Streets et al. 2009) – future emissions                                                                                                          | GEOS-Chem parameterization                                                                                                                                                                                     |
| (Pacyna et al. 2016) (GLEMOS and ECHMERIT)<br>CPS, NPS, and MFR                                        | (AMAP/UNEP, 2013) – baseline emissions<br>(Streets et al. 2009; 2011; 2017) – historical and future scenario emissions<br>(Pacyna et al. 2006; 2010) – earlier global anthropogenic inventories | (Pirrone et al. 2010) – volcanic / geogenic emissions<br>(Smith-Downey et al. 2010) – terrestrial storage and natural re-emissions                                                                             |
| (Angot et al. 2018) (Geos-Chem)<br>NPS and MFR                                                         | (AMAP/UNEP, 2013) – base year emissions<br><br>(Streets et al. 2011) – historical emissions (2000 BCE–2008 CE)<br>(Pacyna et al. 2016) – future scenarios                                       | (Pirrone et al. 2010; Bagnato et al. 2011) – geogenic emissions                                                                                                                                                |
| (Perlanger et al. 2018) (Geos-Chem)<br>Minimal regulation, Policy-in-action, and aspirational scenario | (AMAP/UNEP, 2013) – baseline emissions<br>(Streets et al. 2009; 2011; 2017) – historical and future scenario emissions                                                                          | (Pirrone et al. 2010; Bagnato et al. 2011) – geogenic<br>GEOS-Chem parameterization – natural/legacy emissions                                                                                                 |

|                                                                                           |                                                                                                                                                                                                                                                                                                      |                                                                                                                                                                                                                                      |
|-------------------------------------------------------------------------------------------|------------------------------------------------------------------------------------------------------------------------------------------------------------------------------------------------------------------------------------------------------------------------------------------------------|--------------------------------------------------------------------------------------------------------------------------------------------------------------------------------------------------------------------------------------|
| (Chen et al. 2018) (Geos-Chem)<br>A1B, constant emissions, Hg control, and zero emissions | (Streets et al. 2011) – emissions (2000 BCE–2008 CE)<br>(Horowitz et al. 2014) – commercial-product emissions (1850–2008)<br>AMAP/UNEP (2018) – baseline emissions<br>(Streets et al. 2011) – emissions (1850–1970) by region<br>(Streets et al. 2009; Amos et al. 2013) – future scenario emissions | (Pirrone et al. 2010; Bagnato et al. 2011) – geogenic emissions                                                                                                                                                                      |
| (Y. Zhang et al. 2021) (Geos-Chem)<br>A1B, NPS-delayed, and MFR                           | AMAP/UNEP (2013) – base year emissions<br>(Streets et al. 2009; Pacyna et al. 2016) – future scenario emissions                                                                                                                                                                                      | Default GEOS-Chem datasets                                                                                                                                                                                                           |
| (H. Zhang et al. 2021) (Geos-Chem)<br>A1B, B1                                             | (Pacyna et al. 2010; Zhang et al. 2012) – base year emissions<br>(Streets et al. 2009; Corbitt et al. 2011) – future scenario emissions                                                                                                                                                              | (Mason 2009; Bagnato et al. 2011) – geogenic emissions<br>(Holmes et al. 2010) – biomass burning and soil evasion<br>(Selin et al. 2008) – prompt terrestrial re-emission<br>(Holmes et al. 2010; Zhang et al. 2016) – ocean evasion |

**Table S2.** Acronyms and descriptions for climate-oriented and hybrid mercury emission scenarios.

| <b>Scenarios</b>             | <b>Descriptions</b>                                                                                                                                                                               |
|------------------------------|---------------------------------------------------------------------------------------------------------------------------------------------------------------------------------------------------|
| BAS<br>(Baseline)            | Assumes continuation of air-quality and climate policies in force up to 2012, without introducing additional mercury or emission-control measures beyond 2030.                                    |
| CLIM<br>(Climate Mitigation) | Incorporates a 2 °C global climate policy, achieving substantial reductions in fossil-fuel use and associated mercury emissions by 2050.                                                          |
| CLIM+MFR                     | Climate mitigation scenario with maximum feasible mercury reduction measures, representing the lowest achievable global Hg emissions.                                                             |
| Net-Zero                     | Net-zero energy pathway (< 1.5 °C by 2100) combined with current-legislation Hg and air-quality policies.                                                                                         |
| Net-Zero + Hg MFR            | Combines net-zero climate policy with maximum Hg-specific controls, yielding the lowest feasible Hg emissions by 2050.                                                                            |
| SSP1-2.6                     | A lower-bound emissions scenario reflecting strong emphasis on sustainability and intensive control of climate-forcing agents.                                                                    |
| SSP2-4.5                     | A middle-of-the-road scenario reflecting moderate socioeconomic development and continuation of current trends without strong climate mitigation.                                                 |
| SSP5-3.4                     | An overshoot scenario characterized by short-term growth in fossil fuel use and minimal consideration of climate control measures until 2040 followed by aggressive mitigation after mid-century. |
| SSP5-8.5                     | An upper-bound emissions scenario in which fossil-fuel use continues with little consideration of climate mitigation or transition to clean technologies.                                         |

**Table S3.** Full forms of abbreviations used for meteorological datasets and drivers in atmospheric Hg models.

| <b>Acronym / Model</b> | <b>Descriptions</b>                                                                                                                                                                        |
|------------------------|--------------------------------------------------------------------------------------------------------------------------------------------------------------------------------------------|
| GEOS                   | Goddard Earth Observing System                                                                                                                                                             |
| ECHAM5                 | The fifth-generation atmospheric general circulation model developed at the Max Planck Institute for Meteorology in Hamburg, based on the operational forecast model framework from ECMWF. |
| WRF                    | Weather Research and Forecasting                                                                                                                                                           |
| ECMWF                  | European Centre for Medium-Range Weather Forecasts                                                                                                                                         |
| NCEP                   | National Centers for Environmental Prediction                                                                                                                                              |
| NCAR                   | National Center for Atmospheric Research                                                                                                                                                   |
| ECCC                   | Environment and Climate Change Canada's                                                                                                                                                    |
| GEM                    | Global Environmental Multiscale                                                                                                                                                            |
| GCM                    | General circulation model                                                                                                                                                                  |
| CCSM                   | Community Climate System Model                                                                                                                                                             |
| NCAR-MM                | National Center for Atmospheric Research - Mesoscale Model                                                                                                                                 |
| NOAA                   | National Oceanic and Atmospheric Administration                                                                                                                                            |
| NCDC                   | National Climatic Data Center                                                                                                                                                              |
| MERRA-2                | Modern-Era Retrospective analysis for Research and Applications, Version 2 by NASA's Global Modeling and Assimilation Office (GMAO)                                                        |
| GISS-GCM               | Goddard Institute for Space Studies - general circulation model                                                                                                                            |

15

**Table S4.** Summary of variables used in PCA and MLRM analyses.

| <b>Scenarios</b> | <b>Change in fish MeHg (% yr<sup>-1</sup>)</b> | <b>Change of Hg deposition (% yr<sup>-1</sup>)</b> | <b>Watershed (km<sup>2</sup>)</b> | <b>Lake Area (km<sup>2</sup>)</b> | <b>Wetland (%)</b> | <b>Average depth (m)</b> | <b>Waterbodies</b>         |
|------------------|------------------------------------------------|----------------------------------------------------|-----------------------------------|-----------------------------------|--------------------|--------------------------|----------------------------|
| SRES A2          | 0.114                                          | 0.264                                              | 17.040                            | 1.070                             | 4.030              | 6.400                    | Mendums Pond, NH           |
| SRES B2          | -0.318                                         | -0.346                                             | 17.040                            | 1.070                             | 4.030              | 6.400                    | Mendums Pond, NH           |
| NPS              | -0.275                                         | -0.383                                             | 183.100                           | 7.148                             | 14.285             | 5.570                    | Lakes in Maine, ME         |
| MFR              | -0.550                                         | -0.645                                             | 183.100                           | 7.148                             | 14.285             | 5.570                    | Lakes in Maine, ME         |
| Policy-in-action | -0.250                                         | -0.341                                             | 190.000                           | 9.700                             | 14.210             | 15.000                   | Lakes in Michigan's UP, MI |

|                               |        |        |          |        |        |        |                                                                           |
|-------------------------------|--------|--------|----------|--------|--------|--------|---------------------------------------------------------------------------|
| Aspirational                  | -1.477 | -1.477 | 190.000  | 9.700  | 14.210 | 15.000 | Lakes in Michigan's UP, MI                                                |
| Policy-in-action              | 0.438  | 0.277  | 190.000  | 9.700  | 14.210 | 15.000 | Lake in Michigan's UP with Adirondack's deposition                        |
| Policy-in-action              | -0.857 | 0.277  | 190.000  | 9.700  | 8.800  | 15.000 | Lake in Michigan's UP with Adirondack's deposition and watershed features |
| Reduction in deposition, 50 % | -0.633 | -1.020 | 4.200    | 0.200  | 1.000  | 2.000  | Eagle Butte Lake, SD                                                      |
| Reduction in deposition, 50 % | -1.041 | -1.020 | 0.810    | 0.120  | -      | 4.800  | Lake Barco, FL                                                            |
| Reduction in deposition, 50 % | -1.163 | -1.020 | 50.000   | 3.600  | 4.000  | 5.000  | Pawtuckaway Lake, NH                                                      |
| Reduction in deposition, 50 % | -1.571 | -1.020 | 220.000  | 35.000 | 25.000 | 2.300  | Lake Waccamaw, NC                                                         |
| Reduction in deposition, 50 % | -1.510 | -1.020 | 2190.000 | 9.900  | 8.000  | 0.250  | Brier Creek, GA                                                           |

Note: For NPS and MFR, "Lakes in Maine" reflect the averaged characteristics of 20 modeled lakes.

**Table S5.** MLRM results testing whether lake characteristics alone predict changes in fish MeHg by 2050 in the model world.

|              | <b>Coef</b> | <b>std err</b> | <b>t</b> | <b>P&gt; t </b> | <b>[0.025</b> | <b>0.975]</b> |
|--------------|-------------|----------------|----------|-----------------|---------------|---------------|
| const        | -0.6521     | 0.432          | -1.509   | 0.175           | -1.674        | 0.370         |
| Watershed    | -0.0003     | 0.000          | -0.924   | 0.386           | -0.001        | 0.000         |
| LakeArea     | -0.0687     | 0.045          | -1.526   | 0.171           | -0.175        | 0.038         |
| Wetland      | 0.0582      | 0.061          | 0.947    | 0.375           | -0.087        | 0.203         |
| AverageDepth | 0.0072      | 0.039          | 0.187    | 0.857           | -0.084        | 0.099         |

20

**Table S6.** MLRM results testing lake characteristics together with scenario-specific Hg deposition as predictors of changes in fish MeHg by 2050 in the model world.

|              | <b>Coef</b> | <b>std err</b> | <b>t</b> | <b>P&gt; t </b> | <b>[0.025</b> | <b>0.975]</b> |
|--------------|-------------|----------------|----------|-----------------|---------------|---------------|
| const        | -0.1249     | 0.275          | -0.454   | 0.666           | -0.799        | 0.549         |
| Watershed    | -0.0002     | 0.000          | -1.219   | 0.269           | -0.001        | 0.000         |
| LakeArea     | -0.0656     | 0.025          | -2.599   | 0.041           | -0.127        | -0.004        |
| Wetland      | 0.0685      | 0.035          | 1.982    | 0.095           | -0.016        | 0.153         |
| AverageDepth | -0.0264     | 0.023          | -1.136   | 0.299           | -0.083        | 0.030         |
| Deposition   | 0.7864      | 0.195          | 4.032    | 0.007           | 0.309         | 1.264         |

25 **Table S7.** Characteristics of atmospheric Hg models, including resolution, primary oxidation pathways, and meteorological drivers.

| <b>Model</b> | <b>Spatial resolution</b> | <b>Vertical resolution</b> | <b>Primary Hg<sup>0</sup> oxidation pathways</b>                                                  | <b>Meteorological data sources (type)</b>                               | <b>References</b>                                                  |
|--------------|---------------------------|----------------------------|---------------------------------------------------------------------------------------------------|-------------------------------------------------------------------------|--------------------------------------------------------------------|
| GEOS-Chem    | 4°×5°                     | 47 levels                  | Br                                                                                                | GEOS-5 assimilated meteorology (Offline)                                | (Corbitt et al. 2011; Giang and Selin 2016; Chen et al. 2018)      |
|              | 2°×2.5°                   | 40 levels                  | Br (1 <sup>st</sup> - stage)<br><br>NO <sub>2</sub> and HO <sub>2</sub> (2 <sup>nd</sup> - stage) | MERRA-2 by NASA's GMAO (Offline);<br><br>NASA GISS GCM ModelE2 (Online) | (Angot et al. 2018; Y. Zhang et al. 2021; H. Zhang et al. 2021)    |
| GLEMOS       | 1°×1°                     | 20 levels                  | O <sub>3</sub> and OH<br><br>Br (Polar regions)                                                   | WRF modelling system, based on ECMWF (Offline)                          | (Pacyna et al. 2016; De Simone et al. 2017; Travnikov et al. 2017) |
| ECHMERIT     | 2.8°×2.8°                 | 19 levels                  | O <sub>3</sub> and OH                                                                             | ECHAM5 based on ECMWF (Online)                                          |                                                                    |
| HYSPLIT-Hg   | 2.5°×2.5°                 | 17 levels                  | O <sub>3</sub> and OH                                                                             | NCEP/NCAR reanalysis model (Offline)                                    | (Cohen et al. 2016)                                                |

|                 |           |           |                                 |                                                                     |                                                             |
|-----------------|-----------|-----------|---------------------------------|---------------------------------------------------------------------|-------------------------------------------------------------|
| GEM-<br>MACH-Hg | 1°×1°     | 58 levels | OH<br><br>Br (Polar<br>regions) | GEM model, based on<br>ECCC weather<br>prediction model<br>(Online) | (Travnikov et al. 2017)                                     |
| CAM-<br>Chem/Hg | 1.9°×2.5° | 26 levels | O <sub>3</sub> and OH           | CCSM, V3 (Offline)                                                  | (Lei et al. 2014)                                           |
| CTM-Hg          | 8°×10°    | 9 levels  | O <sub>3</sub> and OH           | GCM (Offline)                                                       | (Bullock Jr. et al. 2009;<br>Vijayaraghavan et al.<br>2014) |
| TEAM            | 10–20 km  | 6 layers  | O <sub>3</sub> and OH           | NCAR-MM5 (Offline)                                                  |                                                             |
| AEROMOD         | 1 km      | -         | O <sub>3</sub> and OH           | NOAA and NCDC<br>(Offline)                                          |                                                             |

Full forms of meteorological abbreviations used in this table are provided in Table S3.

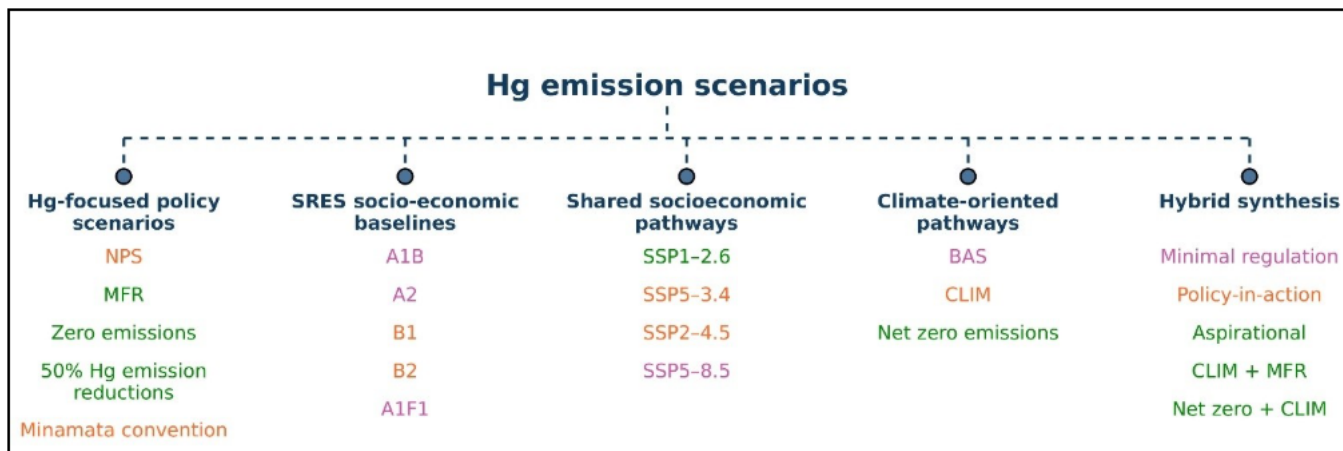

30

**Figure S1: Classification of future Hg emission scenarios by policy focus and emission level. Emission levels are categorized as high (pink), medium (orange), and low (green).**

## References

- 35 Aiuppa, A., Bagnato, E., Witt, M. L. I., Mather, T. A., Parello, F., Pyle, D. M., and Martin, R. S.: Real-time simultaneous detection of volcanic Hg and SO<sub>2</sub> at La Fossa Crater, Vulcano (Aeolian Islands, Sicily), *Geophys. Res. Lett.*, 34, L21307, <https://doi.org/10.1029/2007GL030762>, 2007.
- AMAP/UNEP: Technical Background Report for the Global Mercury Assessment 2013, Arctic Monitoring and Assessment Programme, Oslo, Norway/UNEP Chemicals Branch, Geneva, Switzerland, vi C 263 pp., ISBN9788279710806, 2013.
- 40 AMAP/UN Environment: Technical Background Report for the Global Mercury Assessment 2018, Arctic Monitoring and Assessment Programme, Oslo, Norway/UN Environment Programme, Chemicals and Health Branch, Geneva, Switzerland, viiiC426 pp., ISBN 9788279711087, 2019.
- Amos, H. M., Jacob, D. J., Streets, D. G., and Sunderland, E. M.: Legacy impacts of all-time anthropogenic emissions on the global mercury cycle, *Global Biogeochem. Cycles*, 27, 410–421, <https://doi.org/10.1002/gbc.20040>, 2013.
- 45 Angot, H., Hoffman, N., Giang, A., Thackray, C. P., Hendricks, A. N., Urban, N. R., and Selin, N. E.: Global and local impacts of delayed mercury mitigation efforts, *Environ. Sci. Technol.*, 52, 12968–12977, <https://doi.org/10.1021/acs.est.8b04542>, 2018.
- Bagnato, E., Aiuppa, A., Parello, F., Allard, P., Shinohara, H., Liuzzo, M., and Giudice, G.: New clues on the contribution of Earth's volcanism to the global mercury cycle, *Bull. Volcanol.*, 73, 497–510, <https://doi.org/10.1007/s00445-010-0419-y>, 2011.
- 50 Chen, L., Zhang, W., Zhang, Y., Tong, Y., Liu, M., Wang, H., Xie, H., and Wang, X.: Historical and future trends in global source-receptor relationships of mercury, *Sci. Total Environ.*, 610–611, 24–31, <https://doi.org/10.1016/j.scitotenv.2017.07.182>, 2018.
- Cooper, R. N.: *Climate Change 2001: The Scientific Basis*, *Foreign Aff.*, 81, 208, <https://doi.org/10.2307/20033020>, 2002.

- Corbitt, E. S., Jacob, D. J., Holmes, C. D., Streets, D. G., and Sunderland, E. M.: Global source–receptor relationships for mercury deposition under present-day and 2050 emissions scenarios, *Environ. Sci. Technol.*, 45, 10477–10484, <https://doi.org/10.1021/es202496y>, 2011.
- Electric Power Research Institute (EPRI): Modeling deposition of atmospheric mercury: Case studies, EPRI, Palo Alto, CA, USA, 2006.
- Giang, A., and Selin, N. E.: Benefits of mercury controls for the United States, *Proc. Natl. Acad. Sci. USA*, 113, 286–291, <https://doi.org/10.1073/pnas.1514395113>, 2016.
- Holmes, C. D., Jacob, D. J., Corbitt, E. S., Mao, J., Yang, X., Talbot, R., and Slemr, F.: Global atmospheric model for mercury including oxidation by bromine atoms, *Atmos. Chem. Phys.*, 10, 12037–12057, <https://doi.org/10.5194/acp-10-12037-2010>, 2010.
- Horowitz, H. M., Jacob, D. J., Amos, H. M., Streets, D. G., and Sunderland, E. M.: Historical mercury releases from commercial products: Global environmental implications, *Environ. Sci. Technol.*, 48, 10242–10250, <https://doi.org/10.1021/es501337j>, 2014.
- Lei, H., Liang, X.-Z., Wuebbles, D. J., and Tao, Z.: Model analyses of atmospheric mercury: Present air quality and effects of transpacific transport on the United States, *Atmos. Chem. Phys.*, 13, 10807–10825, <https://doi.org/10.5194/acp-13-10807-2013>, 2013.
- Lei, H., Wuebbles, D. J., Liang, X.-Z., Tao, Z., Olsen, S., Artz, R., Ren, X., and Cohen, M.: Projections of atmospheric mercury levels and their effect on air quality in the United States, *Atmos. Chem. Phys.*, 14, 783–795, <https://doi.org/10.5194/acp-14-783-2014>, 2014.
- Mason, R. P.: Mercury emissions from natural processes and their importance in the global mercury cycle, in: *Mercury Fate and Transport in the Global Atmosphere: Emissions, Measurements and Models*, edited by: Mason, R., and Pirrone, N., Springer, Boston, MA, 173–191, [https://doi.org/10.1007/978-0-387-93958-2\\_7](https://doi.org/10.1007/978-0-387-93958-2_7), 2009.
- Pacyna, E. G., Pacyna, J. M., Steenhuisen, F., and Wilson, S.: Global anthropogenic mercury emission inventory for 2000, *Atmos. Environ.*, 40, 4048–4063, <https://doi.org/10.1016/j.atmosenv.2006.03.041>, 2006.
- Pacyna, E. G., Pacyna, J. M., Sundseth, K., Munthe, J., Kindbom, K., Wilson, S., Steenhuisen, F., and Maxson, P.: Global emission of mercury to the atmosphere from anthropogenic sources in 2005 and projections to 2020, *Atmos. Environ.*, 44, 2487–2499, <https://doi.org/10.1016/j.atmosenv.2009.06.009>, 2010.
- Pacyna, J. M., Travníkov, O., De Simone, F., Hedgecock, I. M., Sundseth, K., Pacyna, E. G., Steenhuisen, F., Pirrone, N., Munthe, J., and Kindbom, K.: Current and future levels of mercury atmospheric pollution on a global scale, *Atmos. Chem. Phys.*, 16, 12495–12511, <https://doi.org/10.5194/acp-16-12495-2016>, 2016.
- Perlinger, J. A., Urban, N. R., Giang, A., Selin, N. E., Hendricks, A. N., Zhang, H., Kumar, A., Wu, S., Gagnon, V. S., Gorman, H. S., and Norman, E. S.: Responses of deposition and bioaccumulation in the Great Lakes region to policy and other large-scale drivers of mercury emissions, *Environ. Sci.: Processes Impacts*, 20, 195–209, <https://doi.org/10.1039/C7EM00547D>, 2018.

- Pirrone, N., Cinnirella, S., Feng, X., Finkelman, R. B., Friedli, H. R., Leaner, J., Mason, R., Mukherjee, A. B., Stracher, G. B., Streets, D. G., and Telmer, K.: Global mercury emissions to the atmosphere from anthropogenic and natural sources, *Atmos. Chem. Phys.*, 10, 5951–5964, <https://doi.org/10.5194/acp-10-5951-2010>, 2010.
- Seigneur, C., Vijayaraghavan, K., Lohman, K., Karamchandani, P., and Scott, C.: Global source attribution for mercury deposition in the United States, *Environ. Sci. Technol.*, 38, 555–569, <https://doi.org/10.1021/es034109t>, 2004.
- Selin, N. E., Jacob, D. J., Yantosca, R. M., Strode, S., Jaeglé, L., and Sunderland, E. M.: Global 3-D land-ocean-atmosphere model for mercury: Present-day versus preindustrial cycles and anthropogenic enrichment factors for deposition, *Global Biogeochem. Cycles*, 22, GB2011, <https://doi.org/10.1029/2007GB003040>, 2008.
- Smith-Downey, N. V., Sunderland, E. M., and Jacob, D. J.: Anthropogenic impacts on global storage and emissions of mercury from terrestrial soils: Insights from a new global model, *J. Geophys. Res.-Biogeo.*, 115, G03008, <https://doi.org/10.1029/2009JG001124>, 2010.
- Streets, D. G., Devane, M. K., Lu, Z., Bond, T. C., Sunderland, E. M., and Jacob, D. J.: All-time releases of mercury to the atmosphere from human activities, *Environ. Sci. Technol.*, 45, 10485–10491, <https://doi.org/10.1021/es202765m>, 2011.
- Streets, D. G., Horowitz, H. M., Jacob, D. J., Lu, Z., Levin, L., ter Schure, A. F. H., and Sunderland, E. M.: Total mercury released to the environment by human activities, *Environ. Sci. Technol.*, 51, 5969–5977, <https://doi.org/10.1021/acs.est.7b00451>, 2017.
- Streets, D. G., Zhang, Q., and Wu, Y.: Projections of global mercury emissions in 2050, *Environ. Sci. Technol.*, 43, 2983–2988, <https://doi.org/10.1021/es802474j>, 2009.
- Vijayaraghavan, K., Levin, L., Parker, L., Yarwood, G., and Streets, D.: Response of fish tissue mercury in a freshwater lake to local, regional, and global changes in mercury emissions, *Environ. Toxicol. Chem.*, 33, 1238–1247, <https://doi.org/10.1002/etc.2584>, 2014.
- Witt, M. L. I., Mather, T. A., Pyle, D. M., Aiuppa, A., Bagnato, E., and Tsanev, V. I.: Mercury and halogen emissions from Masaya and Telica volcanoes, Nicaragua, *J. Geophys. Res.-Solid Earth*, 113, B06203, <https://doi.org/10.1029/2007JB005401>, 2008.
- Zhang, H., Holmes, C. D., and Wu, S.: Impacts of changes in climate, land use and land cover on atmospheric mercury, *Atmos. Environ.*, 141, 230–244, <https://doi.org/10.1016/j.atmosenv.2016.06.056>, 2016.
- Zhang, H., Wu, S., and Leibensperger, E. M.: Source-receptor relationships for atmospheric mercury deposition in the context of global change, *Atmos. Environ.*, 254, 118349, <https://doi.org/10.1016/j.atmosenv.2021.118349>, 2021.
- Zhang, Y., Jaeglé, L., van Donkelaar, A., Martin, R. V., Holmes, C. D., Amos, H. M., Wang, Q., Talbot, R., Artz, R., Brooks, S., Luke, W., Holsen, T. M., Felton, D., Miller, E. K., Perry, K. D., Schmeltz, D., Steffen, A., Tordon, R., Weiss-Penzias, P., and Zsolway, R.: Nested-grid simulation of mercury over North America, *Atmos. Chem. Phys.*, 12, 6095–6111, <https://doi.org/10.5194/acp-12-6095-2012>, 2012.

120 Zhang, Y., Song, Z., Huang, S., Zhang, P., Peng, Y., Wu, P., Gu, J., Dutkiewicz, S., Zhang, H., Wu, S., Wang, F., Chen, L., Wang, S., and Li, P.: Global health effects of future atmospheric mercury emissions, *Nat. Commun.*, 12, 3035, <https://doi.org/10.1038/s41467-021-23391-7>, 2021.
